# Supplementary material for: Salt Adaptation and Evolutionary Implication of a Nah-related PAHs Dioxygenase cloned from a Halophilic Phenanthrene Degrading Consortium
Source: PubMed Central journal article supplement (PMC5624874; doi:10.1038/s41598-017-12979-z), 2017-10-02
Supplement: 41598_2017_12979_MOESM1_ESM.pdf [file 41598_2017_12979_MOESM1_ESM.pdf]

1           **Salt Adaptation and Evolutionary Implication of a**  
2           ***Nah*-related PAHs Dioxygenase cloned from a Halophilic**  
3           **Phenanthrene Degrading Consortium**

4           Chongyang Wang, Guang Guo, Yong Huang, Han Hao, Hui Wang \*

5  
6           State Key Joint Laboratory of Environment Simulation and Pollution Control,

7           School of Environment, Tsinghua University, Beijing, 100084, China

8  
9  
10          \* Correspondence to Hui Wang: [wanghui@mail.tsinghua.edu.cn](mailto:wanghui@mail.tsinghua.edu.cn).

11           Tel: 86-10-62772137; Fax: 86-10-62771472;

12          • Chongyang Wang, [13051971091@163.com](mailto:13051971091@163.com);

13          • Guang Guo, [guoguang007007@163.com](mailto:guoguang007007@163.com);

14           Present address: School of Environmental Engineering, Nanjing Institute of  
15           Technology, Nanjing 211167, China

16          • Yong Huang, [hy791441103@yeah.net](mailto:hy791441103@yeah.net);

- 19 Table S1 show the amino acid constitution of non-conservative region of *nahAc*,  
20 *nahAd*, *nahAb*, and *nahB*
- 21 Figure S1 show the phylogenetic tree of all *nah*-related *Ac* sequences from cultured  
22 bacteria in GenBank
- 23 Figure S2 show the relative expression level of the *nahAd* gene in the *pah* gene cluster  
24 after induction with phenanthrene.
- 25 Figure S3 show the detection of *nahAbAcAd* overproduced in *E. coli* BL21 (DE3)
- 26 Figure S4-S6 show the phylogenetic trees of *nah*-related *Ab*, *Ad*, *B* genes, respectively
- 27 Figure S7 show the gene organization in all *nah*-like gene clusters available in  
28 GenBank
- 29 Figure S8 show the gene organization in the representative gentisate gene clusters

30 Table. S1 Amino Acid constitution of non-conservative region in *nah*-related *Ab*, *Ac*,  
 31 *Ad*, *B* genes

| Strain                                           | <i>nahAb</i> |             | <i>nahAc</i> |              | <i>nahAd</i> |              | <i>nahB</i>  |              |
|--------------------------------------------------|--------------|-------------|--------------|--------------|--------------|--------------|--------------|--------------|
|                                                  | Acid         | Basic       | Acid         | Basic        | Acid         | Basic        | Acid         | Basic        |
| <b><i>Pah</i> gene cluster<br/>in this study</b> | <b>19.57</b> | <b>8.70</b> | <b>14.79</b> | <b>11.24</b> | <b>14.12</b> | <b>9.41</b>  | <b>13.58</b> | <b>19.75</b> |
| Pseudo G7                                        | 17.39        | 8.70        | 10.65        | 12.43        | 8.14         | 12.79        | 12.05        | 20.48        |
| Coma H                                           | 15.22        | 13.04       | 10.78        | 13.17        | 8.14         | 11.63        | 10.84        | 20.48        |
| uncultured                                       | 13.04        | 8.70        | 10.65        | 11.83        | 8.14         | 12.79        | 12.05        | 20.48        |
| Pseudo C18                                       | 13.04        | 8.70        | 10.65        | 11.83        | 6.98         | 11.63        | 12.05        | 21.69        |
| Pseudo 9816                                      | 13.04        | 8.70        | 10.65        | 11.83        | 6.98         | 11.63        | 12.05        | 21.69        |
| Pseudo PC20                                      | 13.04        | 8.70        | 10.65        | 11.83        | 6.98         | 11.63        | 12.05        | 21.69        |
| Pseudo BS202                                     | 13.04        | 8.70        | 10.65        | 11.83        | 6.98         | 11.63        | 12.05        | 21.69        |
| Ralsto U2                                        | 15.22        | 13.04       | 10.78        | 13.17        | 8.14         | 12.79        | 10.84        | 19.28        |
| Burk C3                                          | 15.22        | 10.87       | 10.18        | 13.17        | 8.14         | 12.79        | 9.64         | 20.48        |
| Pseudo OUS82                                     | 19.57        | 8.70        | 9.47         | 11.83        | 9.30         | 11.63        | 12.05        | 20.48        |
| Pseudo PaK1                                      | 15.22        | 8.70        | 12.43        | 13.61        | 12.94        | 9.41         | 9.64         | 20.48        |
| Polaro CJ2                                       | 15.22        | 8.70        | 10.18        | 11.98        | 6.98         | 13.95        |              |              |
| Burk R34                                         | 15.22        | 10.87       | 10.18        | 11.38        | 8.14         | 13.95        |              |              |
| Diapho DS2                                       | 15.22        | 10.87       | 9.58         | 12.57        | 9.41         | 11.76        |              |              |
| Diapho DS3                                       | 15.22        | 10.87       | 9.58         | 12.57        | 9.41         | 11.76        |              |              |
| Coma JS765                                       | 15.22        | 10.87       | 8.98         | 12.57        | 9.30         | 13.95        |              |              |
| <b>average</b>                                   | <b>15.22</b> | <b>9.85</b> | <b>10.64</b> | <b>12.29</b> | <b>8.72</b>  | <b>12.07</b> | <b>11.57</b> | <b>20.72</b> |

32

33

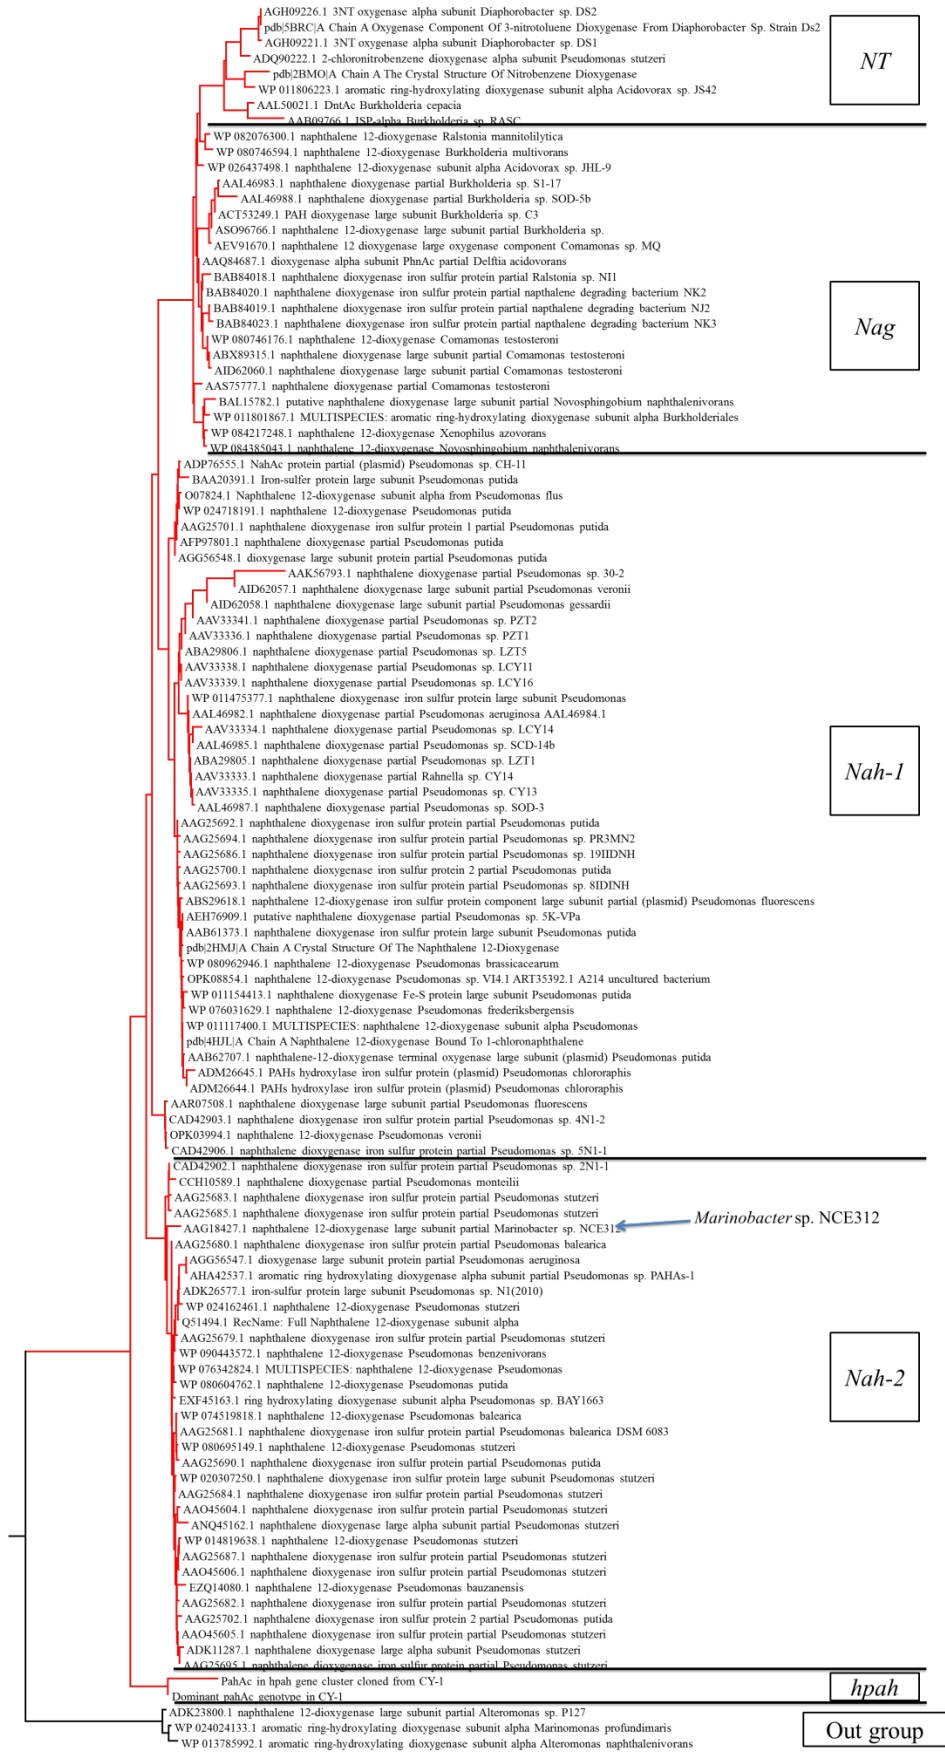

0.05

35 Fig. S1 Phylogenetic tree of all *nah*-related *Ac* sequences from cultured bacteria in  
36 GenBank. This tree is directly output from the distance tree of the blast result in  
37 GenBank. Separation of the four *nah*-related genotypes, i.e. *nah-1*, *nah-2*, *nag*, *NT*  
38 and *hpah*, were labeled in the tree.

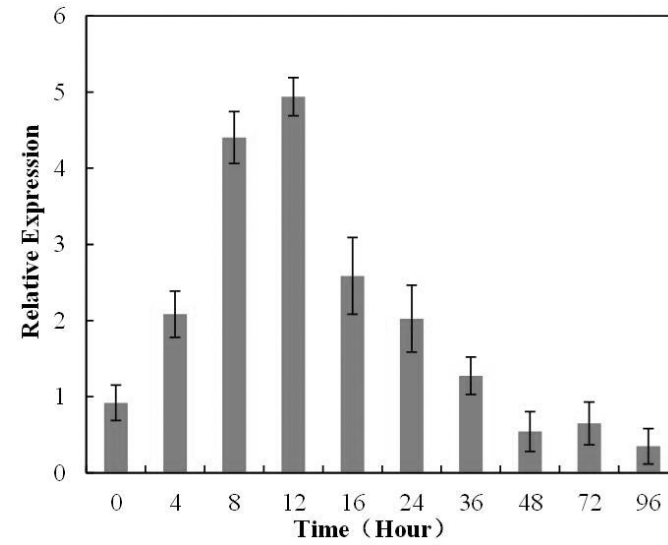

39

40 Fig. S2 Relative expression level of the *nahAd* genes after induction. The  
 41 transcript/gene ratio during microcosm incubation was calculated. Gene expression  
 42 was quantified using qRT-PCR and the comparative critical threshold ( $2^{\Delta\Delta CT}$ ) method.  
 43 Three measure replicates and three microcosm replicates were performed. Vertical  
 44 bars represent standard deviations of the nine replicates of *nahAd* gene  
 45 quantifications.

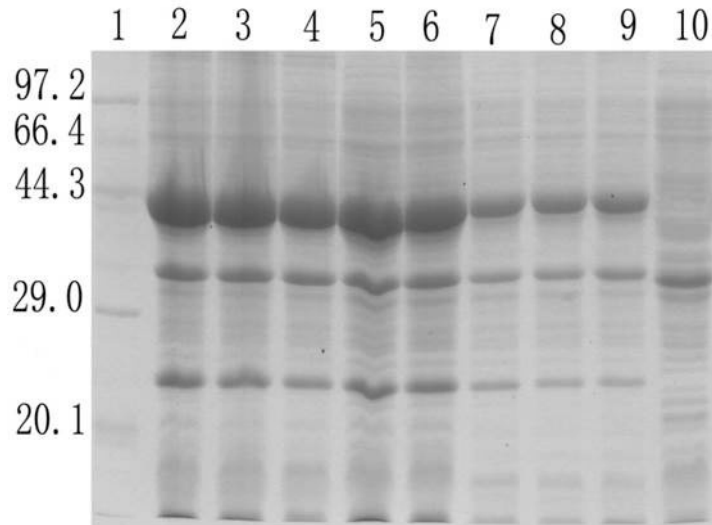

46

47 Fig. S3 Detection of nahAbAcAd overproduced in *E. coli* BL21 (DE3) (pET 28a).

48 High amounts of 50 and 20 kDa that were mainly soluble.

49 1: maker; 2: 30°C 1 mM IPTG; 3: 30°C 0.75 mM IPTG; 4: 30°C 0.5 mM IPTG;

50 5: 25°C 1 mM; 6: IPTG 25°C 0.5 mM IPTG; 7: 25°C 0.75 mM IPTG;

51 8: 20°C 0.5 mM IPTG; 9: 20°C 1 mM IPTG; 10: *E. coli* BL21 (DE3) harboring

52 pET28(a)

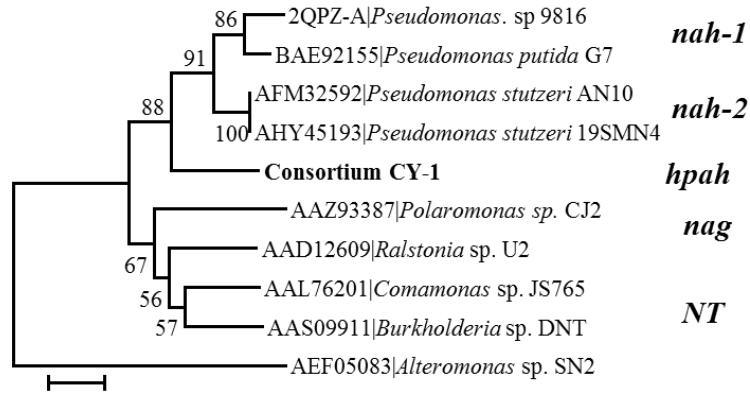

53

54 Fig. S4 Neighbor-joining phylogenetic tree established based on the predicted amino  
 55 acid sequence of *pahAb* and other *nahAb* genes. The phylogenetic and molecular  
 56 evolutionary analyses are conducted by MEGA 6. All the sequences are obtained from  
 57 GenBank and the accession number are shown ahead the strain names. Different  
 58 groups are classified as Fig. 2.

59

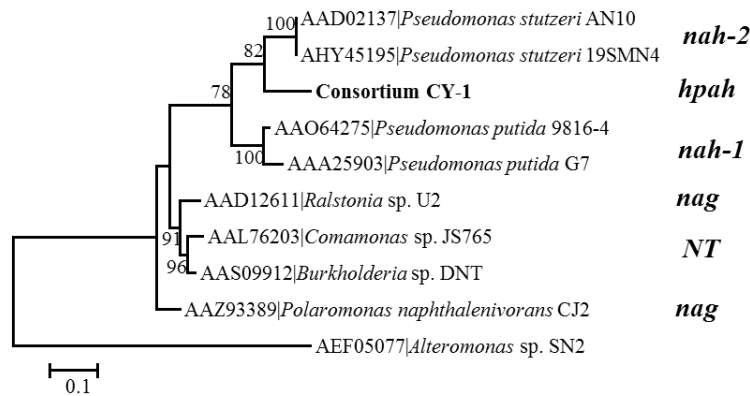

60

61 Fig. S5 Neighbor-joining phylogenetic tree established based on the predicted amino  
 62 acid sequence of *pahAd* and other *nahAd* dioxygenase. The phylogenetic and  
 63 molecular evolutionary analyses are conducted by MEGA 6. All the sequences are  
 64 obtained from GenBank and the accession numbers are shown ahead the strain names.  
 65 Different groups are classified as Fig. 2.

66



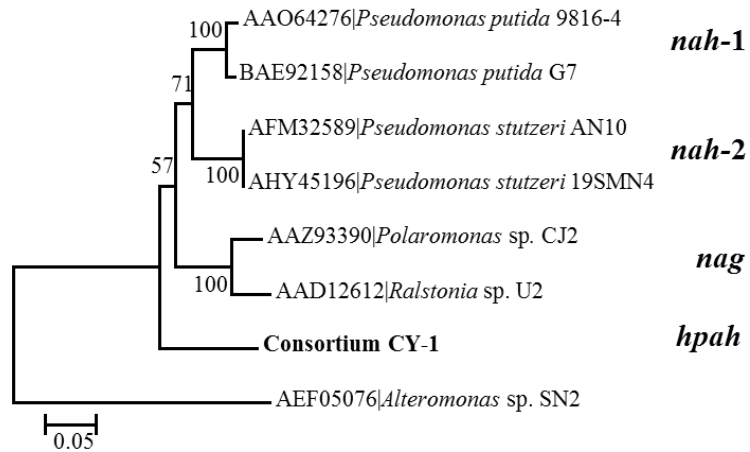

67

68 Fig. S6 Neighbor-joining phylogenetic tree established based on the predicted amino  
69 acid sequence of *pahB* and other *nahB* genes. The phylogenetic and molecular  
70 evolutionary analyses are conducted by MEGA 6. All the sequences are obtained from  
71 GenBank and the accession numbers are shown ahead the strain names. Different  
72 groups are classified as Fig. 2.

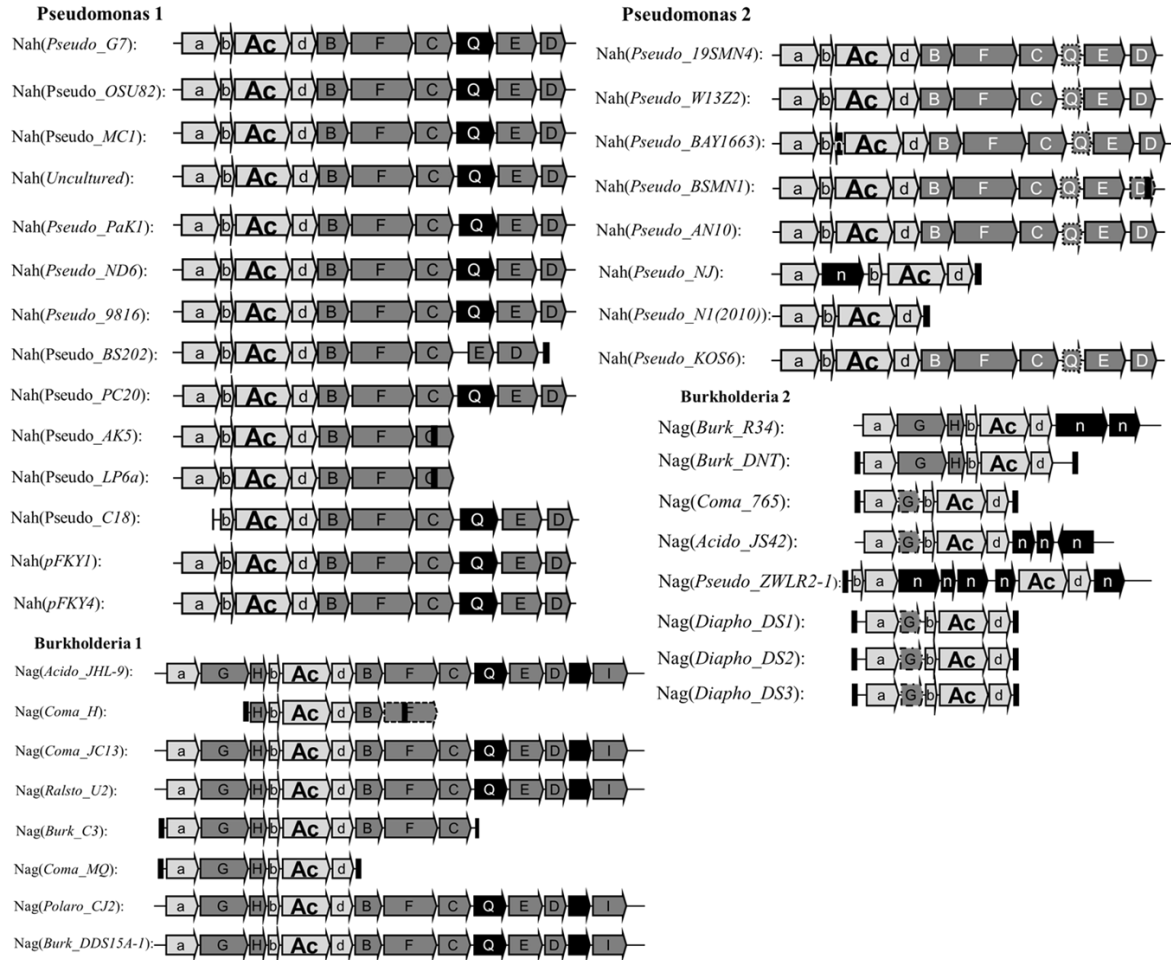

73

74 Fig. S7 Gene organization in *nah*-like gene clusters. Boxes in gray or deep gray  
 75 pointing in the direction of transcription represent genes of PAHs degradation. For  
 76 clarity of presentation, *nahAaAbAcAd* are shown as a,b,Ac,d, etc. Boxes in black are  
 77 hypothetical proteins. Boxes with dashed borders are interrupted genes, incomplete  
 78 sequences are indicated with short vertical bars on the side.

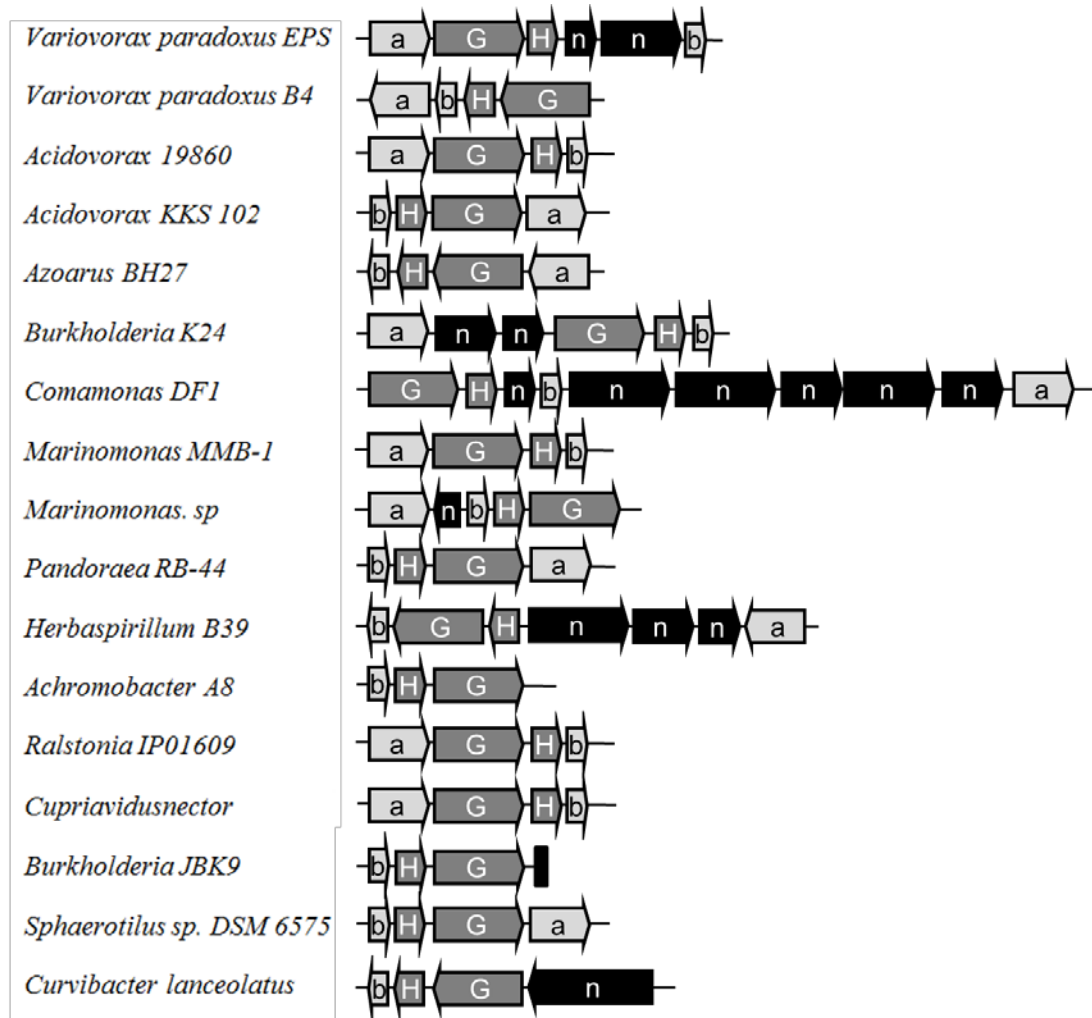

80 Fig. S8 Gene organization in Sal5H gene clusters. Boxes in gray or deep gray pointing  
 81 in the direction of transcription represent Sal5H genes. For clarity of presentation,  
 82 Sal5HAaAbGH are shown as a,b,G,H, etc. Boxes in black are hypothetical proteins.  
 83
